# Supplementary material for: Small tropical islands with dense human population: differences in water quality of near-shore waters are associated with distinct bacterial communities
Source: PeerJ journal article supplement (doi:10.7717/peerj.4555), 2018-05-07

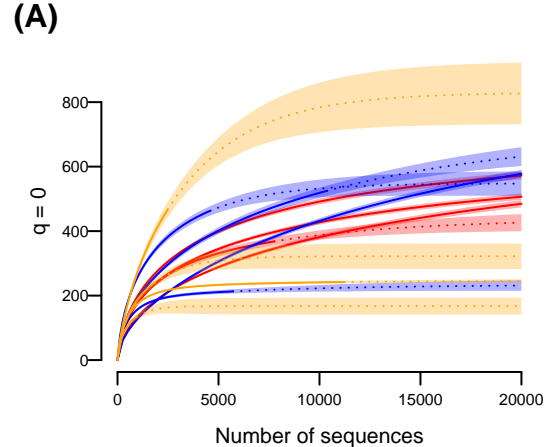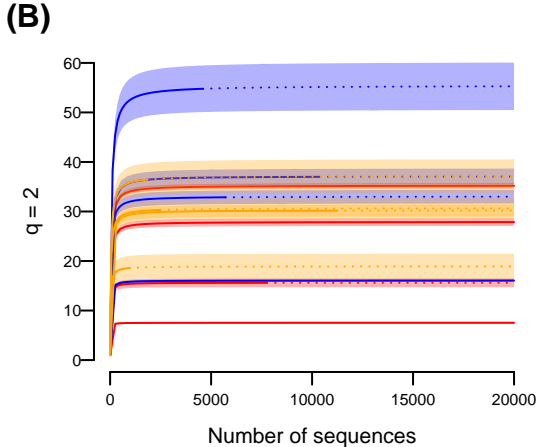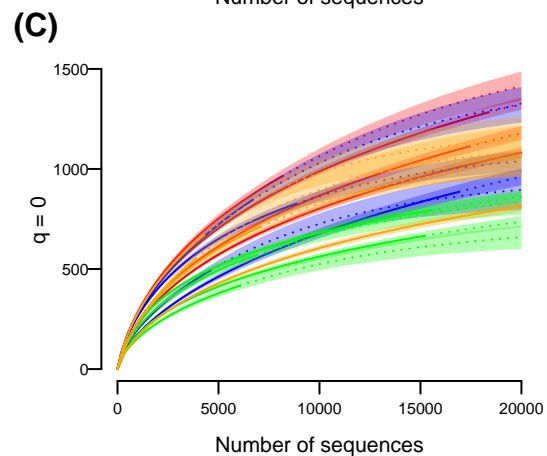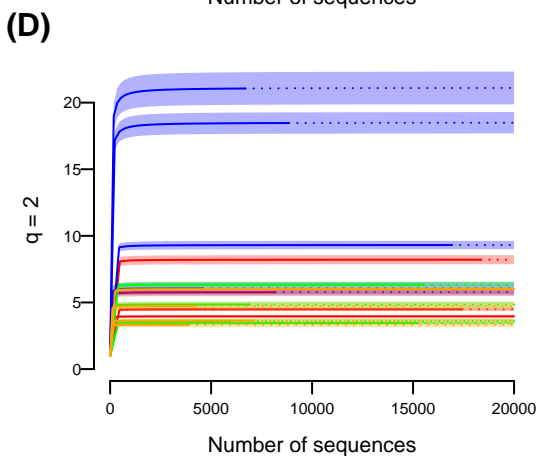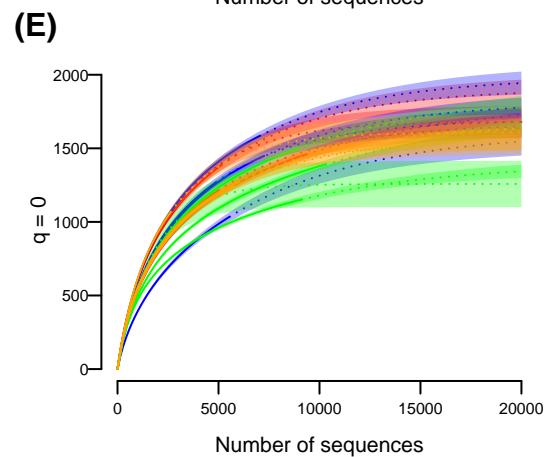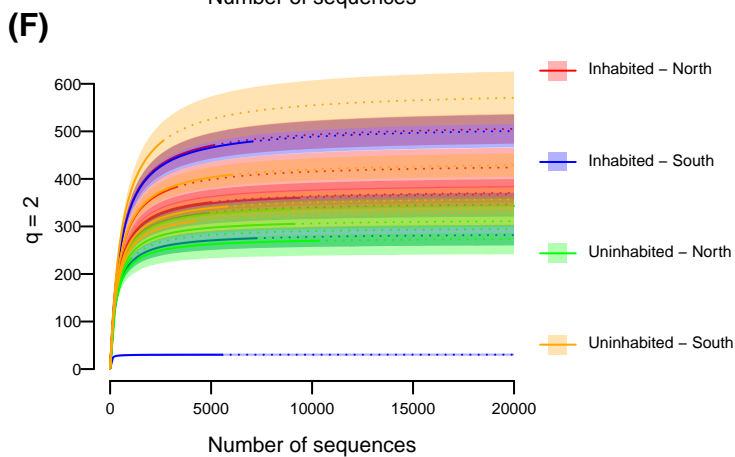

Supplement: SI_Figure_2_iNEXT_plot.pdf [file SI_Figure_2_iNEXT_plot.pdf]
