# Supplementary material for: Small tropical islands with dense human population: differences in water quality of near-shore waters are associated with distinct bacterial communities
Source: PeerJ journal article supplement (doi:10.7717/peerj.4555), 2018-05-07
Supplement: SI_figure_5_heatmap_pathogens.pdf [file SI_figure_5_heatmap_pathogens.pdf]

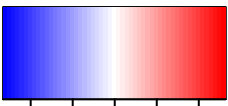

-10 -5 0 5 10

clr-transformed sequence counts

FL

No data

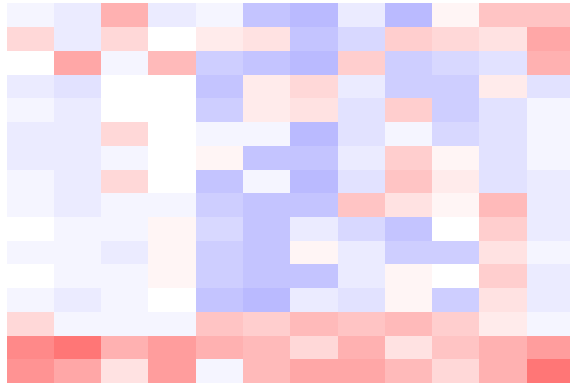

Vibrio\_sq216  
Staphylococcus\_sq1637  
Ralstonia\_sq2827  
Vibrio\_sq593  
Vibrio\_sq989  
Mycobacterium\_sq688  
Vibrio\_sq485  
Vibrio\_sq509  
Vibrio\_sq859  
Vibrio\_sq589  
Vibrio\_sq1644  
Vibrio\_sq489  
Vibrio\_sq1236  
Vibrio\_sq938  
Propionibacterium\_sq219  
Staphylococcus\_sq288

PA

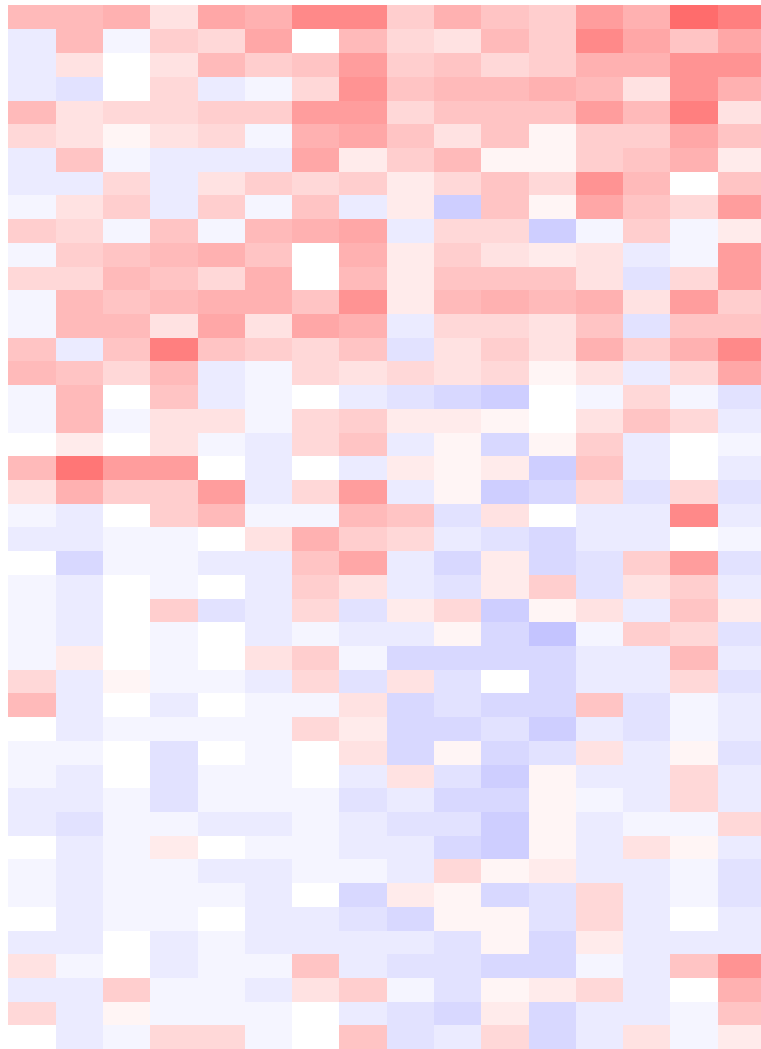

Vibrio\_sq216  
Vibrio\_sq509  
Vibrio\_sq529  
Vibrio\_sq593  
Vibrio\_sq589  
Vibrio\_sq1330  
Vibrio\_sq1614  
Vibrio\_sq989  
Vibrio\_sq1236  
Vibrio\_sq1854  
Propionibacterium\_sq219  
Vibrio\_sq859  
Vibrio\_sq485  
Vibrio\_sq1127  
Vibrio\_sq489  
Vibrio\_sq1981  
Vibrio\_sq2946  
Vibrio\_sq2576  
Vibrio\_sq3381  
Mycobacterium\_sq688  
Vibrio\_sq1373  
Vibrio\_sq1644  
Vibrio\_sq3145  
Vibrio\_sq2412  
Vibrio\_sq3260  
Vibrio\_sq3228  
Vibrio\_sq3761  
Vibrio\_sq3654  
Vibrio\_sq3750  
Staphylococcus\_sq1637  
Mycobacterium\_sq2509  
Vibrio\_sq3822  
Vibrio\_sq3806  
Vibrio\_sq3892  
Vibrio\_sq3891  
Vibrio\_sq3893  
Vibrio\_sq3694  
Vibrio\_sq3747  
Vibrio\_sq3614  
Vibrio\_sq3885  
Vibrio\_sq1659  
Staphylococcus\_sq288  
Vibrio\_sq938  
Vibrio\_sq3322

SED

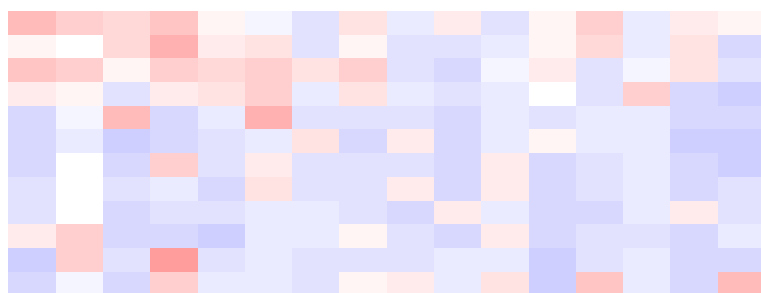

Vibrio\_sq216  
Vibrio\_sq529  
Propionibacterium\_sq219  
Vibrio\_sq1127  
Vibrio\_sq485  
Vibrio\_sq589  
Mycobacterium\_sq688  
Vibrio\_sq3614  
Vibrio\_sq593  
Vibrio\_sq1236  
Vibrio\_sq489  
Mycobacterium\_sq2509

Uninhabited\_North\_25m  
Uninhabited\_North\_75m  
Uninhabited\_North\_150m  
Uninhabited\_North\_300m  
Uninhabited\_South\_25m  
Uninhabited\_South\_75m  
Uninhabited\_South\_150m  
Uninhabited\_South\_300m  
Inhabited\_North\_25m  
Inhabited\_North\_75m  
Inhabited\_North\_150m  
Inhabited\_North\_300m  
Inhabited\_South\_25m  
Inhabited\_South\_75m  
Inhabited\_South\_150m  
Inhabited\_South\_300m
